# Supplementary material for: Croconic Acid Doped Triglycine Sulfate: Crystal Structure, UV-Vis, FTIR, Raman, Photoluminescence Spectroscopy, and Dielectric Properties
Source: MDPI journal article supplement (doi:10.3390/cryst12050679), 2022-05-09
Supplement: s1 [file s1]

## Supplementary Materials

For Article:

# Croconic Acid Doped Triglycine Sulfate: Crystal Structure, UV-Vis, FTIR, Raman, Photoluminescence Spectroscopy, and Dielectric Properties

Elena Balashova <sup>1\*</sup>, Aleksandr A. Levin <sup>1</sup>, Valery Davydov <sup>1</sup>, Alexander Smirnov <sup>1</sup>, Anatoly Starukhin <sup>1</sup>, Sergei Pavlov <sup>1</sup>, Boris Krichevtsov <sup>1</sup>, Andrey Zolotarev <sup>2</sup>, Hongjun Zhang <sup>3</sup>, Fangzhe Li <sup>3</sup> and Hua Ke <sup>3</sup>

<sup>1</sup> Ioffe Institute, Politechnicheskaya 26, 194021 Saint Petersburg, Russia; aleksandr.a.levin@mail.ioffe.ru (A.A.L.); Valery.Davydov@mail.ioffe.ru (V.Y.D.); Alex.Smirnov@mail.ioffe.ru (A.N.S.); boris@mail.ioffe.ru (B.B.K.); A.Starukhin@mail.ioffe.ru (A.N.S.); Pavlov\_sergey@mail.ioffe.ru (S.I.P.)

<sup>2</sup> Saint-Petersburg State University, Saint-Petersburg 199034, Russia, a.zolotarev@spbu.ru (A.A.Z.)

<sup>3</sup> Harbin Institute of Technology, Harbin 150080, China; zhanghj@hit.edu.cn (H.Zh.); lifangzhe@hit.edu.cn (F.L.); hua\_ke@hit.edu.cn (H.K.)

\* Correspondence: balashova@mail.ioffe.ru

### SM.1. Single crystal XRD

**Table S1.1.** Results of refinement of the TGS:CA(80:20) structure (space group  $P2_1(4)$ ) using single crystal XRD data. Atomic numbers  $Z$ , relative coordinates of atoms ( $x/a$ ,  $y/b$ ,  $z/c$ )<sup>a</sup> and their equivalent isotropic (for non-H atoms) or overall isotropic (for H atoms) temperature factors  $U_{eq/iso}$  are shown.

| N  | Atom | Z  | $x/a$       | $y/b$       | $z/c$       | $U_{eq/iso}(\text{\AA}^2)$ |
|----|------|----|-------------|-------------|-------------|----------------------------|
| 1  | S1   | 16 | -0.50029(7) | 0.84266(10) | 0.22619(12) | 0.0324(2)                  |
| 2  | O1   | 8  | -0.6422(2)  | 0.8411(4)   | 0.0071(4)   | 0.0432(5)                  |
| 3  | O2   | 8  | -0.5348(2)) | 0.8441(3)   | 0.4556(4)   | 0.0444(5)                  |
| 4  | O5   | 8  | -0.4153(4)  | 0.9384(2)   | 0.2083(7)   | 0.0444(9)                  |
| 5  | O6   | 8  | -0.4125(3)  | 0.7485(2)   | 0.2143(7)   | 0.0442(8)                  |
| 6  | O3   | 8  | 0.1065(2)   | 0.8354(4)   | 0.0776(4)   | 0.0511(6)                  |
| 7  | O11  | 8  | -0.0047(3)  | 0.8267(4)   | -0.3328(5)  | 0.0632(11)                 |
| 8  | C12  | 6  | -0.0106(3)  | 0.8327(5)   | -0.1276(6)  | 0.0424(8)                  |
| 9  | N17  | 7  | -0.1423(4)  | 0.8795(3)   | 0.1624(6)   | 0.0574(10)                 |
| 10 | H17A | 1  | -0.232207   | 0.899519    | 0.166477    | 0.069(?)                   |
| 11 | H17B | 1  | -0.079876   | 0.934842    | 0.195904    | 0.069                      |
| 12 | H17C | 1  | -0.104135   | 0.829059    | 0.275115    | 0.069                      |
| 13 | C18  | 6  | -0.1601(3)  | 0.8385(5)   | -0.0851(6)  | 0.0456(7)                  |
| 14 | H18A | 1  | -0.228699   | 0.884113    | -0.209868   | 0.055(?)                   |
| 15 | H18B | 1  | -0.204780   | 0.768376    | -0.103655   | 0.055                      |
| 16 | O4   | 8  | 0.2793(4)   | 1.0877(3)   | 0.2237(7)   | 0.0512(9)                  |
| 17 | N7   | 7  | 0.3947(4)   | 1.0228(3)   | 0.6974(8)   | 0.0422(10)                 |
| 18 | H7A  | 1  | 0.436755    | 0.986522    | 0.604936    | 0.051(?)                   |
| 19 | H7B  | 1  | 0.419263    | 0.992994    | 0.846837    | 0.051                      |
| 20 | H7C  | 1  | 0.428265    | 1.089313    | 0.713656    | 0.051                      |
| 21 | O13  | 8  | 0.0399(4)   | 1.0610(3)   | 0.2000(8)   | 0.0546(9)                  |
| 22 | C16  | 6  | 0.1834(5)   | 1.0604(3)   | 0.3145(9)   | 0.0385(10)                 |
| 23 | O8   | 8  | 0.2858(4)   | 0.5909(3)   | 0.2384(7)   | 0.0505(9)                  |
| 24 | N9   | 7  | 0.4156(4)   | 0.6665(3)   | 0.7052(7)   | 0.0394(9)                  |
| 25 | H9A  | 1  | 0.448741    | 0.713538    | 0.619965    | 0.047(?)                   |

|    |      |   |           |           |            |            |
|----|------|---|-----------|-----------|------------|------------|
| 26 | H9B  | 1 | 0.455173  | 0.603271  | 0.695924   | 0.047      |
| 27 | H9C  | 1 | 0.443587  | 0.686593  | 0.863506   | 0.047      |
| 28 | C10  | 6 | 0.2512(5) | 0.6603(4) | 0.6008(10) | 0.0445(11) |
| 29 | H10A | 1 | 0.208628  | 0.730390  | 0.599292   | 0.053(?)   |
| 30 | H10B | 1 | 0.214566  | 0.615141  | 0.704914   | 0.053      |
| 31 | O14  | 8 | 0.0512(4) | 0.6125(3) | 0.2443(8)  | 0.0609(10) |
| 32 | C15  | 8 | 0.1985(6) | 0.6165(4) | 0.3391(10) | 0.0442(12) |
| 33 | C1   | 6 | 0.2294(6) | 1.0224(4) | 0.5768(10) | 0.0450(11) |
| 34 | H1A  | 1 | 0.184307  | 1.067621  | 0.669245   | 0.054(?)   |
| 35 | H1B  | 1 | 0.191547  | 0.951003  | 0.579060   | 0.054      |
| 36 | H3   | 1 | 0.190(6)  | 0.827(6)  | 0.046(9)   | 0.089(17)  |
| 37 | H13  | 1 | 0.011(7)  | 1.082(5)  | 0.074(9)   | 0.058(18)  |

<sup>a</sup> The carbon and nitrogen-bound H atoms shown without estimated standard deviations (e.s.d.s) were placed in calculated positions and were included in the refinement in the 'riding' model approximation.

**Table S1.2.** Anisotropic atomic displacement parameters  $U_{ij}$  for the TGS:CA (80:20).

| Atom | $U_{11}$ , (Å <sup>2</sup> ) | $U_{22}$ , (Å <sup>2</sup> ) | $U_{33}$ , (Å <sup>2</sup> ) | $U_{23}$ , (Å <sup>2</sup> ) | $U_{13}$ , (Å <sup>2</sup> ) | $U_{12}$ , (Å <sup>2</sup> ) |
|------|------------------------------|------------------------------|------------------------------|------------------------------|------------------------------|------------------------------|
| S1   | 0.0319(3)                    | 0.0315(3)                    | 0.0348(4)                    | 0.0005(6)                    | 0.0130(3)                    | -0.0004(5)                   |
| O1   | 0.0358(10)                   | 0.0557(12)                   | 0.0378(10)                   | -0.0045(19)                  | 0.0121(8)                    | -0.0043(19)                  |
| O2   | 0.0523(12)                   | 0.0469(12)                   | 0.0381(11)                   | 0.0010(18)                   | 0.0209(9)                    | 0.001(2)                     |
| O5   | 0.049(2)                     | 0.0342(18)                   | 0.054(2)                     | -0.0008(15)                  | 0.0222(16)                   | -0.0074(15)                  |
| O6   | 0.0399(17)                   | 0.0368(18)                   | 0.058(2)                     | 0.0014(15)                   | 0.0192(15)                   | 0.0058(14)                   |
| O3   | 0.0332(10)                   | 0.0727(18)                   | 0.0477(12)                   | -0.004(2)                    | 0.0143(9)                    | 0.003(2)                     |
| O11  | 0.0517(14)                   | 0.091(3)                     | 0.0470(14)                   | -0.0030(18)                  | 0.0166(11)                   | 0.0100(19)                   |
| C12  | 0.0401(15)                   | 0.039(2)                     | 0.0480(17)                   | 0.000(2)                     | 0.0147(13)                   | 0.001(2)                     |
| N17  | 0.0381(16)                   | 0.083(3)                     | 0.056(2)                     | -0.0027(16)                  | 0.0223(14)                   | -0.0079(15)                  |
| C18  | 0.0367(14)                   | 0.0469(17)                   | 0.0513(17)                   | 0.001(3)                     | 0.0126(12)                   | -0.002(3)                    |
| O4   | 0.0446(19)                   | 0.060(2)                     | 0.046(2)                     | 0.0139(15)                   | 0.0117(16)                   | -0.0014(16)                  |
| N7   | 0.049(2)                     | 0.042(2)                     | 0.034(2)                     | 0.0061(15)                   | 0.0124(17)                   | 0.0004(16)                   |
| O13  | 0.0417(18)                   | 0.067(2)                     | 0.050(2)                     | 0.0110(18)                   | 0.0095(16)                   | 0.0069(16)                   |
| C16  | 0.038(2)                     | 0.033(2)                     | 0.042(2)                     | 0.0012(18)                   | 0.0114(19)                   | -0.0002(17)                  |
| O8   | 0.046(2)                     | 0.059(2)                     | 0.047(2)                     | -0.0093(15)                  | 0.0176(16)                   | 0.0039(16)                   |
| N9   | 0.0438(19)                   | 0.035(2)                     | 0.036(2)                     | -0.0002(15)                  | 0.0100(16)                   | 0.0032(16)                   |
| C10  | 0.046(2)                     | 0.047(3)                     | 0.044(2)                     | -0.005(2)                    | 0.020(2)                     | -0.001(2)                    |
| O14  | 0.0388(17)                   | 0.084(3)                     | 0.059(2)                     | -0.0090(18)                  | 0.0163(15)                   | -0.0104(17)                  |
| C15  | 0.044(2)                     | 0.039(3)                     | 0.049(3)                     | -0.0002(19)                  | 0.016(2)                     | -0.0036(18)                  |
| C1   | 0.040(2)                     | 0.049(3)                     | 0.047(3)                     | 0.003(2)                     | 0.016(2)                     | -0.0030(19)                  |

**Table S1.3.** Results of refinement of the TGS:CA(90:10) structure (space group  $P2_1$  (4)) using single crystal XRD data. Atomic numbers  $Z$ , relative coordinates of atoms ( $x/a$ ,  $y/b$ ,  $z/c$ )<sup>a</sup> and their equivalent isotropic (for non-H atoms) or overall isotropic (for H atoms) temperature factors  $U_{eq/iso}$  are shown.

| N | Atom | $Z$ | $x/a$       | $y/b$      | $z/c$       | $U_{eq/iso}$ (Å <sup>2</sup> ) |
|---|------|-----|-------------|------------|-------------|--------------------------------|
| 1 | S1   | 16  | -0.00057(8) | 0.61108(9) | 0.22657(13) | 0.0167(2)                      |
| 2 | O8   | 8   | -0.2135(4)  | 0.3587(4)  | 0.2398(7)   | 0.0353(9)                      |
| 3 | O5   | 8   | 0.0846(4)   | 0.7069(2)  | 0.2096(7)   | 0.0267(8)                      |
| 4 | O1   | 8   | -0.1424(3)  | 0.6102(4)  | 0.0092(5)   | 0.0268(6)                      |
| 5 | O2   | 8   | -0.0340(3)  | 0.6126(3)  | 0.4585(5)   | 0.0281(6)                      |
| 6 | O13  | 8   | -0.5388(4)  | 0.3291(3)  | -0.1951(7)  | 0.0346(9)                      |

|    |      |   |            |           |             |            |
|----|------|---|------------|-----------|-------------|------------|
| 7  | O6   | 8 | 0.0870(4)  | 0.5166(2) | 0.2123(7)   | 0.0280(8)  |
| 8  | O3   | 8 | -0.3935(3) | 0.6021(4) | 0.0798(5)   | 0.0342(7)  |
| 9  | C15  | 6 | -0.2998(6) | 0.3840(4) | 0.3414(9)   | 0.0263(10) |
| 10 | O11  | 8 | -0.5050(4) | 0.5916(4) | -0.3309(6)  | 0.0457(12) |
| 11 | N9   | 7 | -0.0816(5) | 0.4351(3) | 0.7070(7)   | 0.0248(8)  |
| 12 | H9A  | 1 | -0.050132  | 0.487501  | 0.633478    | 0.030(?)   |
| 13 | H9B  | 1 | -0.042050  | 0.374336  | 0.680412    | 0.030      |
| 14 | H9C  | 1 | -0.052336  | 0.447348  | 0.869527    | 0.030      |
| 15 | O4   | 8 | -0.7793(4) | 0.3544(3) | -0.2224(7)  | 0.0339(9)  |
| 16 | O14  | 8 | -0.4479(5) | 0.3791(4) | 0.2510(8)   | 0.0452(11) |
| 17 | H14  | 1 | -0.474951  | 0.356914  | 0.107993    | 0.068(?)   |
| 18 | N7   | 7 | -0.8942(5) | 0.2915(3) | -0.6984(8)  | 0.0254(9)  |
| 19 | H7A  | 1 | -0.918776  | 0.260485  | -0.846365   | 0.031(?)   |
| 20 | H7B  | 1 | -0.927481  | 0.357890  | -0.717562   | 0.031      |
| 21 | H7C  | 1 | -0.936272  | 0.256370  | -0.604622   | 0.031      |
| 22 | N17  | 7 | -0.6424(5) | 0.6485(4) | 0.1649(8)   | 0.0383(10) |
| 23 | H17A | 1 | -0.732567  | 0.665870  | 0.170380    | 0.046(?)   |
| 24 | H17B | 1 | -0.583875  | 0.705650  | 0.193543    | 0.046      |
| 25 | H17C | 1 | -0.600141  | 0.599884  | 0.280151    | 0.046      |
| 26 | C1   | 6 | -0.7286(6) | 0.2910(4) | -0.5770(10) | 0.0291(10) |
| 27 | H1A  | 1 | -0.683855  | 0.336908  | -0.668025   | 0.035(?)   |
| 28 | H1B  | 1 | -0.690847  | 0.219961  | -0.581299   | 0.035      |
| 29 | C18  | 6 | -0.6601(4) | 0.6055(5) | -0.0829(7)  | 0.0286(8)  |
| 30 | H18A | 1 | -0.729056  | 0.649920  | -0.209444   | 0.034(?)   |
| 31 | H18B | 1 | -0.703580  | 0.535191  | -0.098639   | 0.034      |
| 32 | C12  | 6 | -0.5103(4) | 0.5998(5) | -0.1251(7)  | 0.0267(9)  |
| 33 | C10  | 6 | -0.2477(6) | 0.4286(4) | 0.6036(10)  | 0.0285(10) |
| 34 | H10A | 1 | -0.290385  | 0.498480  | 0.601430    | 0.034(?)   |
| 35 | H10B | 1 | -0.283552  | 0.383588  | 0.708507    | 0.034      |
| 36 | C16  | 6 | -0.6820(5) | 0.3278(4) | -0.3116(9)  | 0.0252(9)  |
| 37 | H3   | 1 | -0.301(8)  | 0.595(7)  | 0.072(11)   | 0.07(2)    |

<sup>a</sup> The carbon and nitrogen-bound H atoms shown without estimated standard deviations (e.s.d.s) were placed in calculated positions and were included in the refinement in the 'riding' model approximation.

**Table S1.4.** Anisotropic atomic displacement parameters  $U_{ij}$  for tTGS:CA (90:10).

| Atom | $U_{11}$ , (Å <sup>2</sup> ) | $U_{22}$ , (Å <sup>2</sup> ) | $U_{33}$ , (Å <sup>2</sup> ) | $U_{23}$ , (Å <sup>2</sup> ) | $U_{13}$ , (Å <sup>2</sup> ) | $U_{12}$ , (Å <sup>2</sup> ) |
|------|------------------------------|------------------------------|------------------------------|------------------------------|------------------------------|------------------------------|
| S1   | 0.0160(4)                    | 0.0160(4)                    | 0.0194(4)                    | 0.0005(4)                    | 0.0076(3)                    | -0.0001(4)                   |
| O8   | 0.0286(19)                   | 0.046(2)                     | 0.0314(19)                   | -0.0077(15)                  | 0.0103(15)                   | 0.0044(16)                   |
| O5   | 0.0288(19)                   | 0.0187(17)                   | 0.0365(19)                   | -0.0001(14)                  | 0.0164(15)                   | -0.0074(14)                  |
| O1   | 0.0179(11)                   | 0.0390(15)                   | 0.0212(11)                   | -0.0032(17)                  | 0.0041(9)                    | -0.0032(18)                  |
| O2   | 0.0364(15)                   | 0.0308(14)                   | 0.0218(12)                   | 0.0022(16)                   | 0.0160(11)                   | 0.0009(18)                   |
| O13  | 0.0216(16)                   | 0.043(2)                     | 0.0346(18)                   | -0.0044(16)                  | 0.0039(13)                   | -0.0010(15)                  |
| O6   | 0.0249(17)                   | 0.0206(18)                   | 0.0388(19)                   | -0.0005(15)                  | 0.0112(15)                   | 0.0060(14)                   |
| O3   | 0.0174(12)                   | 0.053(2)                     | 0.0317(14)                   | -0.0015(18)                  | 0.0084(11)                   | 0.0048(18)                   |
| C15  | 0.028(2)                     | 0.021(2)                     | 0.030(2)                     | -0.0012(17)                  | 0.0110(18)                   | -0.0023(17)                  |

|     |            |          |            |             |            |             |
|-----|------------|----------|------------|-------------|------------|-------------|
| O11 | 0.0349(17) | 0.071(4) | 0.0316(16) | -0.0042(18) | 0.0117(13) | 0.008(2)    |
| N9  | 0.0302(19) | 0.023(2) | 0.0205(17) | -0.0007(14) | 0.0077(15) | 0.0042(16)  |
| O4  | 0.031(2)   | 0.042(2) | 0.0276(18) | -0.0099(15) | 0.0078(15) | 0.0021(16)  |
| O14 | 0.0283(19) | 0.071(3) | 0.035(2)   | -0.0107(19) | 0.0100(16) | -0.016(2)   |
| N7  | 0.028(2)   | 0.023(2) | 0.0210(18) | -0.0056(14) | 0.0028(15) | 0.0002(15)  |
| N17 | 0.0227(18) | 0.058(3) | 0.039(2)   | -0.0007(18) | 0.0163(16) | -0.0057(17) |
| C1  | 0.025(2)   | 0.035(3) | 0.028(2)   | -0.0035(18) | 0.0093(18) | 0.0012(19)  |
| C18 | 0.0184(15) | 0.031(2) | 0.0347(19) | -0.004(2)   | 0.0066(13) | -0.001(2)   |
| C12 | 0.0196(16) | 0.027(3) | 0.0326(19) | 0.0005(18)  | 0.0084(14) | 0.0016(19)  |
| C10 | 0.030(2)   | 0.030(3) | 0.028(2)   | -0.0068(19) | 0.0132(18) | 0.000(2)    |
| C16 | 0.023(2)   | 0.019(2) | 0.031(2)   | -0.0027(17) | 0.0048(17) | 0.0003(16)  |

**Table S1.5.** Bond lengths (Å) in TGS:CA (80:20) and TGS:CA (90:10) structure according to results of structure refinement using single crystal XRD data (Table S1.1., S1.3.).

| Bond       | TGS:CA (80:20) | TGS:CA (90:10) |
|------------|----------------|----------------|
| S1– O1     | 1.484(2)       | 1.481(3)       |
| S1 – O2    | 1.459(2)       | 1.470(3)       |
| S1 – O5    | 1.472(3)       | 1.476(3)       |
| S1– O6     | 1.462(3)       | 1.471(4)       |
| O3 – C12   | 1.306(4)       | 1.305(5)       |
| O3 – H3    | 0.87(5)        | 0.90(7)        |
| O1 – C12   | 1.198(4)       | 1.203(5)       |
| C12 – C18  | 1.509(4)       | 1.516(5)       |
| N17 – H17A | 0.8900         | 0.8900         |
| N17 – H17B | 0.8900         | 0.8900         |
| N17 – H17C | 0.8900         | 0.8900         |
| N17 – C18  | 1.464(5)       | 1.478(6)       |
| C18 – H18A | 0.9700         | 0.9700         |
| C18 – H18B | 0.9700         | 0.9700         |
| O4 – C16   | 1.235(6)       | 1.242(6)       |
| N7 – H7A   | 0.8900         | 0.8900         |
| N7 – H7B   | 0.8900         | 0.8900         |
| N7 – H7C   | 0.8900         | 0.8900         |
| N7 – C1    | 1.468(7)       | 1.476(7)       |
| O13 – C16  | 1.282(6)       | 1.285(6)       |
| O13 – H13  | 0.73(5)        | –              |
| C16 – C1   | 1.493(7)       | 1.505(7)       |
| O8 – C15   | 1.199(6)       | 1.198(6)       |
| N9 – H9A   | 0.8900         | 0.8900         |
| N9 – H9B   | 0.8900         | 0.8900         |
| N9 – H9C   | 0.8900         | 0.8900         |
| N9 – C10   | 1.455(6)       | 1.475(7)       |
| C10 – H10A | 0.9700         | 0.9700         |
| C10 – H10B | 0.9700         | 0.9700         |
| C10 – C15  | 1.512(7)       | 1.520(7)       |
| O14 – C15  | 1.303(6)       | 1.314(7)       |
| C1 – H1A   | 0.9700         | 0.9700         |
| C1 – H1B   | 0.9700         | 0.9700         |

**Table S1.6.** Bond angles (°) in in TGS:CA (80:20) and TGS:CA (90:10) structure according to results of structure refinement using single crystal XRD data (Table S1.2)

|                   | TGS:CA (80:20)<br>Bond angles (°) | TGS:CA (90:10)<br>Bond angles (°) |
|-------------------|-----------------------------------|-----------------------------------|
| O2 – S1 – O1      | 110.38(12)                        | 110.37(17)                        |
| O2 – S1 – O5      | 110.3(2)                          | 109.9(2)                          |
| O2 – S1 – O6      | 110.9(2)                          | 111.2(2)                          |
| O5 – S1 – O1      | 107.7(2)                          | 107.8(2)                          |
| O6 – S1 – O1      | 107.9(2)                          | 108.0(2)                          |
| O6 – S1 – O5      | 109.64(12)                        | 109.52(17)                        |
| C12 – O3 – H3     | 111(3)                            | 119(4)                            |
| O3 – C12 – C18    | 113.4(3)                          | 113.5(3)                          |
| O11 – C12 – O3    | 125.1(3)                          | 125.3(4)                          |
| O11 – C12 – C18   | 121.5(3)                          | 121.1(4)                          |
| H17A – N17 – H17B | 109.5                             | 109.5                             |
| H17A – N17 – H17C | 109.5                             | 109.5                             |
| H17B – N17 – H17C | 109.5                             | 109.5                             |
| C18 – N17 – H17A  | 109.5                             | 109.5                             |
| C18 – N17 – H17B  | 109.5                             | 109.5                             |
| C18 – N17 – H17C  | 109.5                             | 109.5                             |
| C12 – C18 – H18A  | 109.2                             | 109.3                             |
| C12 – C18 – H18B  | 109.2                             | 109.3                             |
| N17 – C18 – C12   | 111.8(3)                          | 111.7(3)                          |
| N17 – C18 – H18A  | 109.2                             | 109.3                             |
| N17 – C18 – H18B  | 109.2                             | 109.3                             |
| H18A – C18 – H18B | 107.9                             | 107.9                             |
| H7A – N7 – H7B    | 109.5                             | 109.5                             |
| H7A – N7 – H7C    | 109.5                             | 109.5                             |
| H7B – N7 – H7C    | 109.5                             | 109.5                             |
| C1 – N7 – H7A     | 109.5                             | 109.5                             |
| C1 – N7 – H7B     | 109.5                             | 109.5                             |
| C1 – N7 – H7C     | 109.5                             | 109.5                             |
| C16 – O13 – H13   | 119(5)                            |                                   |
| O4 – C16 – O13    | 125.1(5)                          | 125.2(5)                          |
| O4 – C16 – C1     | 120.9(4)                          | 120.1(4)                          |
| O13 – C16 – C1    | 113.9(5)                          | 114.7(5)                          |
| H9A – N9 – H9B    | 109.5                             | 109.5                             |
| H9A – N9 – H9C    | 109.5                             | 109.5                             |
| H9B – N9 – H9C    | 109.5                             | 109.5                             |
| C10 – N9 – H9A    | 109.5                             | 109.5                             |
| C10 – N9 – H9B    | 109.5                             | 109.5                             |
| C10 – N9 – H9C    | 109.5                             | 109.5                             |
| N9 – C10 – H10A   | 109.3                             | 109.5                             |
| N9 – C10 – H10B   | 109.3                             | 109.5                             |
| N9 – C10 – C15    | 111.5(4)                          | 110.8(4)                          |
| H10A – C10 – H10B | 108.0                             | 108.1                             |
| C15 – C10 – H10A  | 109.3                             | 109.5                             |
| C15 – C10 – H10B  | 109.3                             | 109.5                             |
| O8 – C15 – C10    | 122.1(4)                          | 122.6(4)                          |
| O8 – C15 – O14    | 126.4(5)                          | 127.2(5)                          |
| O14 – C15 – C10   | 111.5(5)                          | 110.2(5)                          |

|                |          |          |
|----------------|----------|----------|
| N7 – C1 – C16  | 111.4(4) | 111.6(4) |
| N7 – C1 – H1A  | 109.3    | 109.3    |
| N7 – C1 – H1B  | 109.3    | 109.3    |
| C16 – C1 – H1A | 109.3    | 109.3    |
| C16 – C1 – H1B | 109.3    | 109.3    |
| H1A – C1 – H1B | 108.0    | 108.0    |

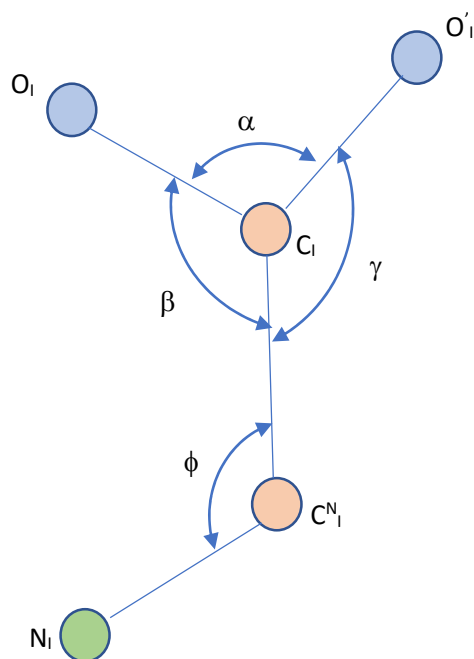

**Figure S1.1.** Schematic representation of a glycine molecule.  $\alpha$ ,  $\beta$ ,  $\gamma$ ,  $\phi$  - angles between bonds.

**SM.2. Powder XRD. WHP graphs for TGS and TGS:CA (90:10).**

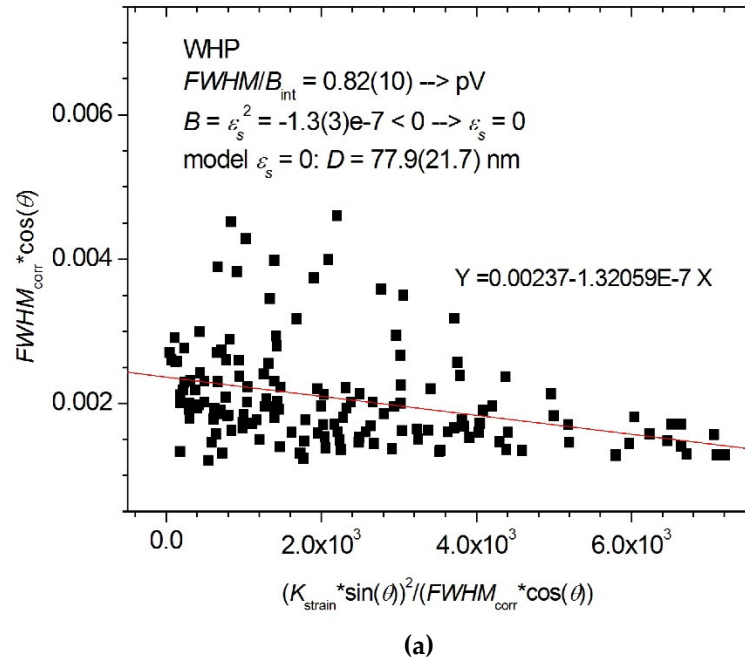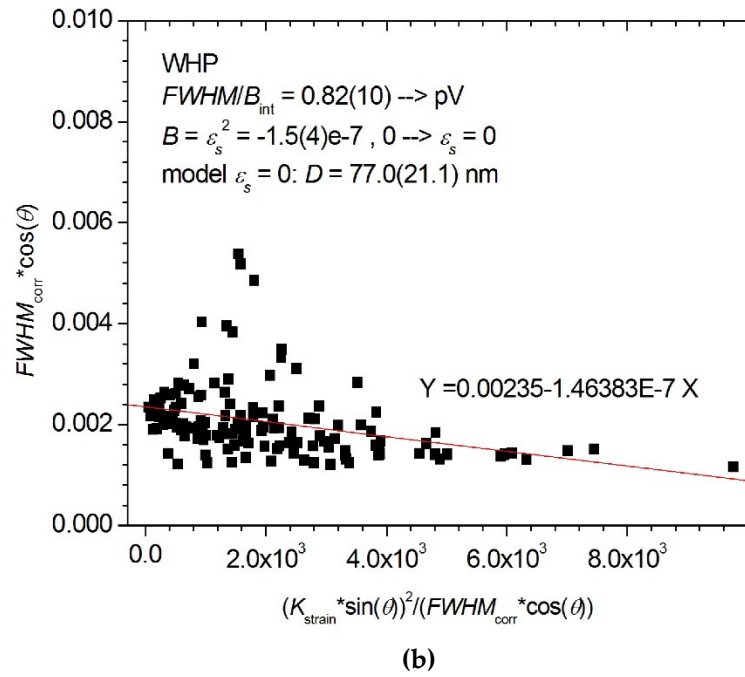

**Figure S2.1.** WHP graphs for. (a) TGS, (b) TGS:CA (90:10).  $FWHM_{corr}$  is full width at half maximum of the XRD reflection corrected to instrumental broadening,  $K_{strain} = 4$ ,  $\theta$  is half of Bragg angle of the reflection after angular corrections applied. Equation of linear WHP graph is  $Y = A + B \cdot X$ , where  $X$  and  $Y$  are quantities shown in horizontal and vertical axes, respectively. Other designations are given in the text of the paper.
